# Supplementary material for: Trends in Outpatient Care and Use of Telemedicine After Hospital Discharge in a Large Commercially Insured Population
Source: PubMed Central journal article supplement (PMC8796902; doi:10.1001/jamahealthforum.2021.3685), 2021-11-12
Supplement: jamahealthforum-e213685-s001.pdf [file jamahealthforum-e213685-s001.pdf]

## Supplemental Online Content

Bressman E, Russo A, Werner RM. Trends in outpatient care and use of telemedicine after hospital discharge in a large commercially insured population. *JAMA Health Forum*. 2021;2(11). doi:10.1001/jamahealthforum.2021.3685

### **eMethods.**

This supplemental material has been provided by the authors to give readers additional information about their work.

Telehealth services were identified as those services which were billed using any of the following criteria:

- Place of service of 02
- Procedure code modifiers of 95, G0, GQ or GT
- Telehealth procedure codes:

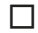

| Procedure Code | Description                                       | Procedure Code | Description                                                            |
|----------------|---------------------------------------------------|----------------|------------------------------------------------------------------------|
| 98966          | NON-FACE-TO-FACE NONPHYSICIAN TELEPHONE SERVICES  | 99473          | REMOTE PHYS MONITORING                                                 |
| 98967          | NON-FACE-TO-FACE NONPHYSICIAN TELEPHONE SERVICES  | 99474          | REMOTE PHYS MONITORING                                                 |
| 98968          | NON-FACE-TO-FACE NONPHYSICIAN TELEPHONE SERVICES  | G0181          | HOME HEALTH CARE SUPERVISION                                           |
| 98969          | ONLINE DIGITAL E&M SERVICES                       | G0182          | HOSPICE CARE SUPERVISION                                               |
| 98970          | NON-FACE-TO-FACE NONPHYSICIAN ONLINE E&M SERVICES | G0406          | INPATIENT CONSULTATION - TELEHEALTH                                    |
| 98971          | NON-FACE-TO-FACE NONPHYSICIAN ONLINE E&M SERVICES | G0407          | INPATIENT CONSULTATION - TELEHEALTH                                    |
| 98972          | NON-FACE-TO-FACE NONPHYSICIAN ONLINE E&M SERVICES | G0408          | INPATIENT CONSULTATION - TELEHEALTH                                    |
| 99091          | REMOTE PHYS MONITORING                            | G0425          | EMERGENCY ROOM/INPATIENT - TELEHEALTH                                  |
| 99421          | ONLINE DIGITAL E&M SERVICES                       | G0426          | EMERGENCY ROOM/INPATIENT - TELEHEALTH                                  |
| 99422          | ONLINE DIGITAL E&M SERVICES                       | G0427          | EMERGENCY ROOM/INPATIENT - TELEHEALTH                                  |
| 99423          | ONLINE DIGITAL E&M SERVICES                       | G0459          | INPATIENT PHARM MANAGEMENT - TELEHEALTH                                |
| 99441          | NON-FACE-TO-FACE TELEPHONE SERVICES               | G0508          | CRITICAL CARE - TELEHEALTH                                             |
| 99442          | NON-FACE-TO-FACE TELEPHONE SERVICES               | G0509          | CRITICAL CARE - TELEHEALTH                                             |
| 99443          | NON-FACE-TO-FACE TELEPHONE SERVICES               | G2010          | REMOTE IMAGE/VIDEO EVALUATION                                          |
| 99444          | ONLINE DIGITAL E&M SERVICES                       | G2012          | VIRTUAL CHECK IN BY PHYS OR QUAL HEALTH CARE PROF E&M                  |
| 99453          | REMOTE PHYS MONITORING                            | G2061          | QUAL NONPHYS HEALTH PROF ONLINE ASSESS & MANAGEMENT SVC, EST PT 5-10M  |
| 99454          | REMOTE PHYS MONITORING                            | G2062          | QUAL NONPHYS HEALTH PROF ONLINE ASSESS & MANAGEMENT SVC, EST PT 11-20M |
| 99457          | REMOTE PHYS MONITORING                            | G2063          | QUAL NONPHYS HEALTH PROF ONLINE ASSESS & MANAGEMENT SVC, EST PT >21M   |
| 99458          | REMOTE PHYS MONITORING                            |                |                                                                        |
